# Supplementary material for: Targeting the transmembrane cytokine co-receptor neuropilin-1 in distal tubules improves renal injury and fibrosis
Source: PubMed Central journal article supplement (PMC11231174; doi:10.1038/s41467-024-50121-6), 2024-07-08
Supplement: 41467_2024_50121_MOESM1_ESM.pdf [file 41467_2024_50121_MOESM1_ESM.pdf]

1 **SUPPLEMENTARY INFORMATION**

2 **Title:**

3 Targeting the transmembrane cytokine co-receptor neuropilin-1 in distal tubules improves  
4 renal injury and fibrosis

5 **Author list:**

6 Yinzheng Li<sup>1</sup>, Zheng Wang<sup>1</sup>, Huzi Xu<sup>1</sup>, Yu Hong<sup>1</sup>, Mengxia Shi<sup>1</sup>, Bin Hu<sup>1</sup>, Xiuru Wang<sup>1</sup>,  
7 Shulin Ma<sup>1</sup>, Meng Wang<sup>1</sup>, Chujin Cao<sup>1</sup>, Han Zhu<sup>1</sup>, Danni Hu<sup>1</sup>, Chang xu<sup>1</sup>, Yanping Lin<sup>1</sup>,  
8 Gang Xu<sup>1,\*</sup>, Ying Yao<sup>1,2,\*</sup>, Rui Zeng<sup>1,3,\*</sup>

9 **Affiliations:**

10 <sup>1</sup> Division of Nephrology, Tongji Hospital, Tongji Medical College, Huazhong University of  
11 Science and Technology, 1095 Jiefang Ave, Wuhan 430030, China

12 <sup>2</sup> Department of Nutrition, Tongji Hospital, Tongji Medical College, Huazhong University of  
13 Science and Technology, 1095 Jiefang Ave, Wuhan 430030, China

14 <sup>3</sup> Key Laboratory of Organ Transplantation, Ministry of Education, NHC Key Laboratory of  
15 Organ Transplantation, Key Laboratory of Organ Transplantation, Chinese Academy of  
16 Medical Sciences, Wuhan 430030, China.

17 \*Correspondence: zengrui@tjh.tjmu.edu.cn (R.Z.), yaoyingkk@126.com (Y.Y.),  
18 xugang@tjh.tjmu.edu.cn (G.X.)

19

20 **Inventory of Supporting Information:**

21 Supplementary Figures 1 to 10

22 Supplementary Tables 1 to 3

23 References 1 to 3

24

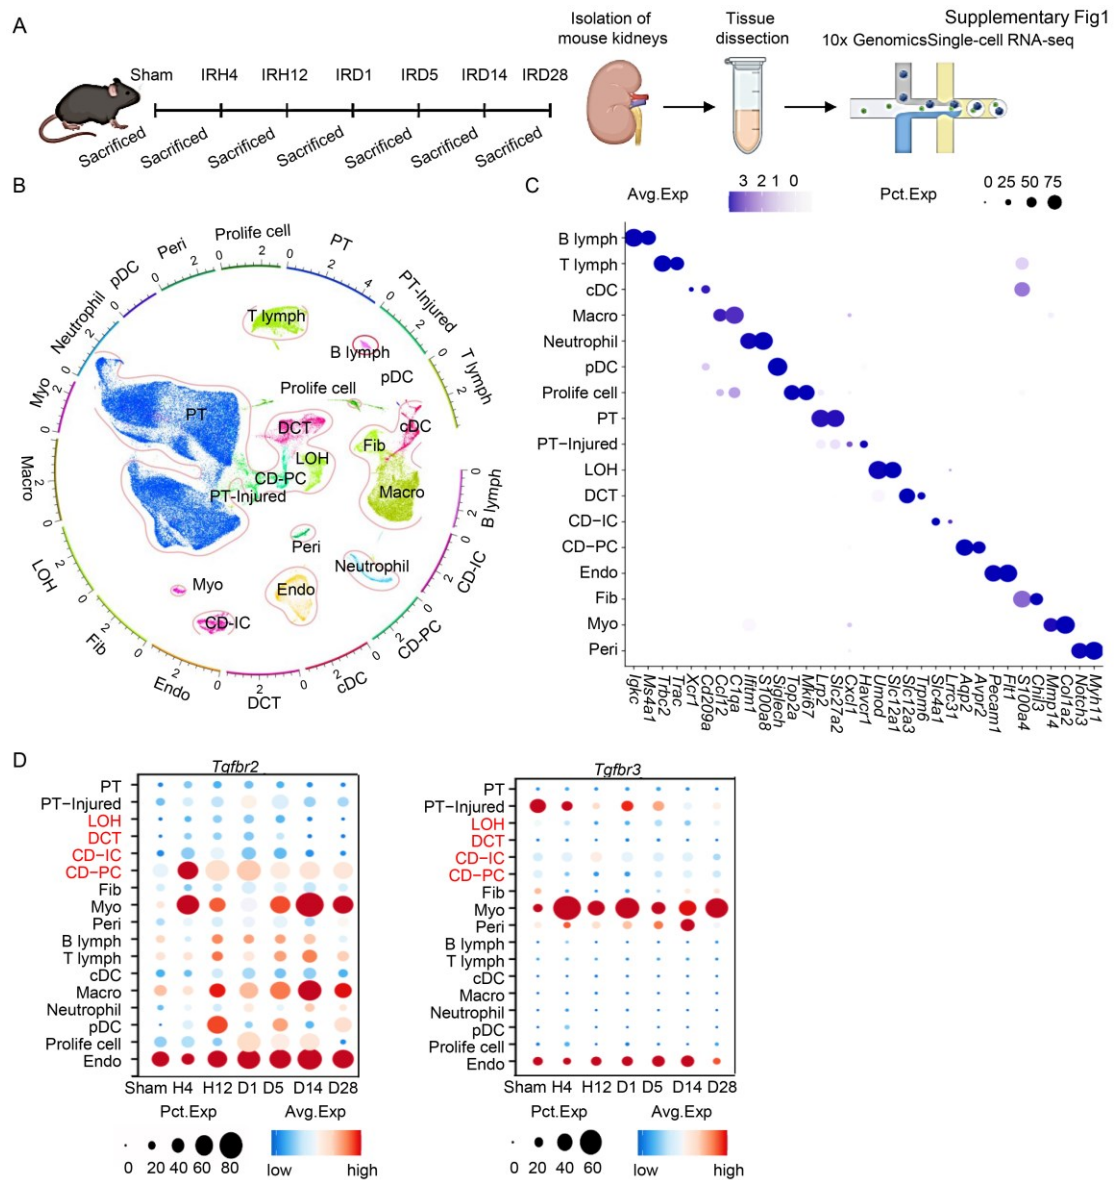

25

26 **Supplementary Figure 1. A single-cell transcriptomics landscape of mouse kidney**

27 **after I-R.** (A) A schematic diagram illustrating the workflow for single-cell RNA sequencing

28 sample submission. Supplementary Figure 1A, created with BioRender.com, released

29 under a Creative Commons Attribution-NonCommercial-NoDerivs 4.0 International license.

30 (B) A UMAP presentation depicted cells profiled from individual mouse kidneys under

31 healthy or IR conditions. The surrounding circular layouts represent the cell number of each

32 population on a logarithmic scale. PT, proximal tubule; PT-Injured, injured PT; LOH, loop

33 of Henle ; DCT, distal convoluted tubule; CD-PC, principal cell of collecting duct; CD-IC,

34 intercalated cell of collecting duct; EC, endothelial cell; Peri, Pericytes; Fib, fibroblast; Myo,  
35 myofibroblast; Prolife cell, proliferating cell; Macro, macrophage; T lymph, T lymphocyte; B  
36 lymph, B lymphocyte; cDC, conventional dendritic cell; pDC, plasmacytoid dendritic cell;  
37 Neutrophil, Neutrophil. (C) Dotplot showing gene expression levels and proportions of  
38 cluster-specific marker genes in each cluster. (D) Expression levels of *Tgfr2* and *Tgfr3*  
39 in kidney after IR surgery.  
40

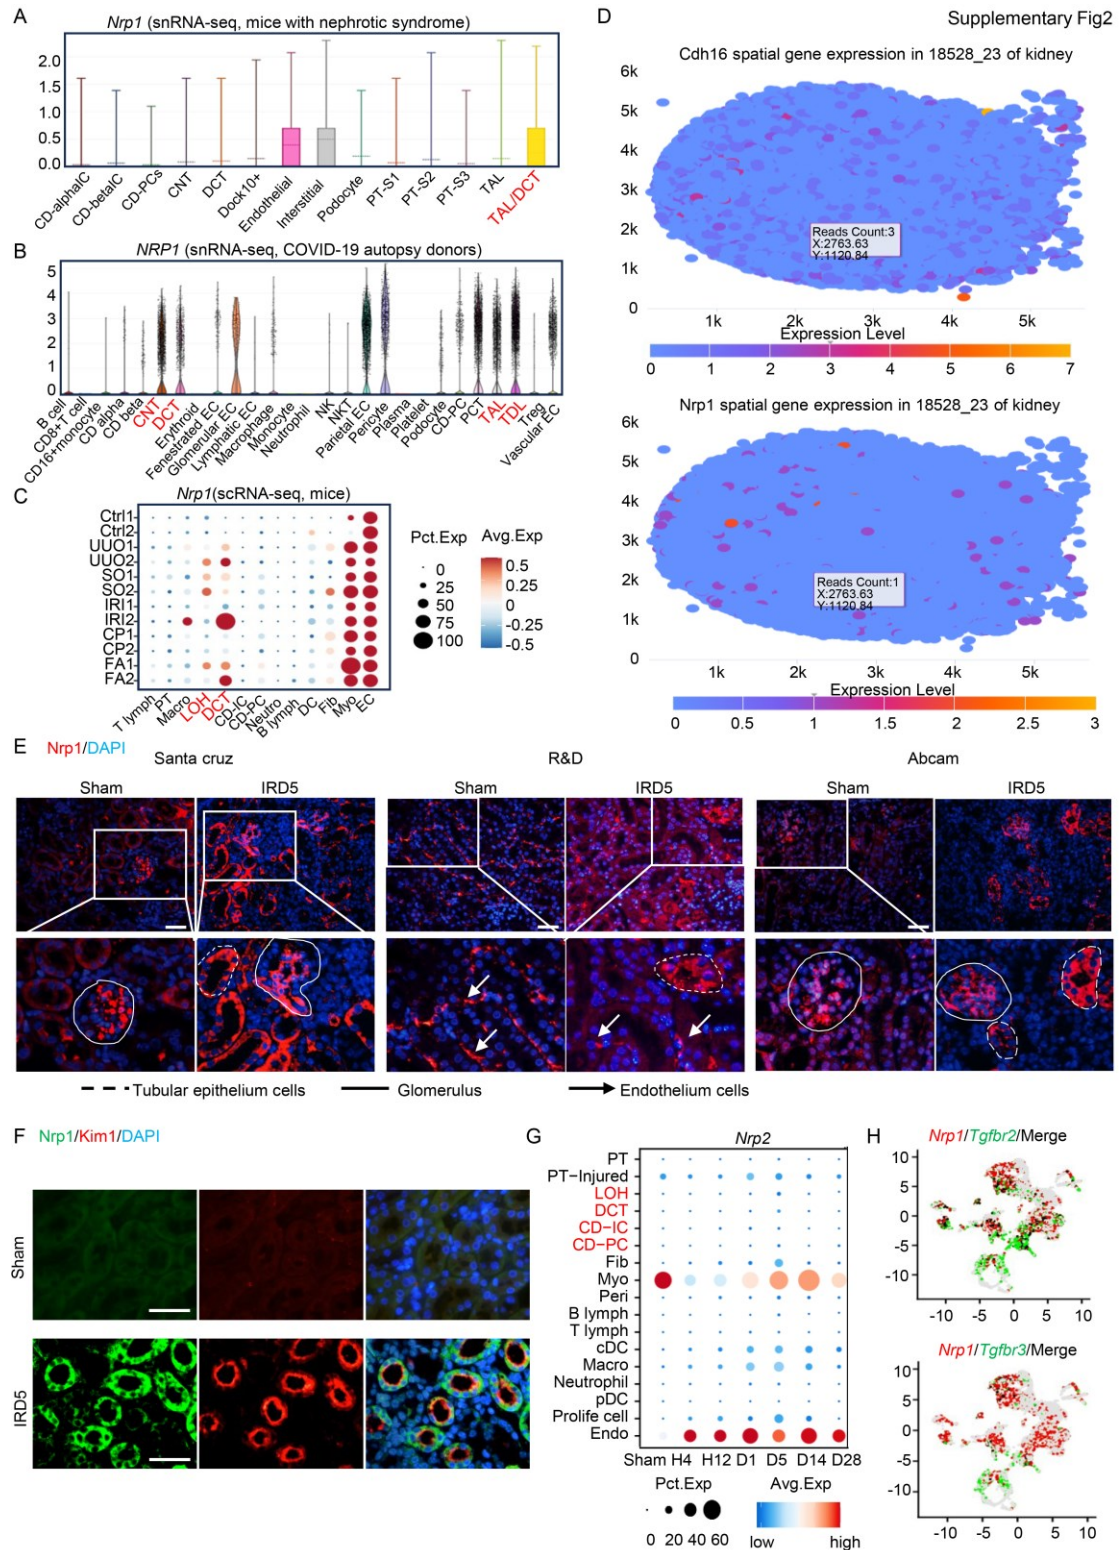

41

42 **Supplementary Figure 2. *Nrp1* is expressed in distal TECs.** (A) Expression levels of

43 *Nrp1* in mice with nephrotic syndrome. Figure created with

44 <https://singlecell.broadinstitute.org/>. The data is pubic in Single Cell Portal whitepaper

45 (<https://www.biorxiv.org/content/10.1101/2023.07.13.548886v1>). (B) Expression of *Nrp1* in  
46 COVID-19 autopsy donors. Image from <https://singlecell.broadinstitute.org/>. The data is  
47 public in Single Cell Portal whitepaper  
48 (<https://www.biorxiv.org/content/10.1101/2023.07.13.548886v1>). (C) The expression levels  
49 of *Nrp1* in the mice kidneys after UUO, sodium oxalate (SO), IR, cisplatin (CP), and folic  
50 acid (FA). The data comes from GSE197266. (D) Expression of *Nrp1* and *Cdh16* in mouse  
51 renal space transcriptomics. Image from <https://www.spatialomics.org/SpatialDB/>. (E) *Nrp1*  
52 immunofluorescence staining with antibody from Santa cruz, R&D and Abcam. (F) Co-  
53 expression of *Nrp1* with *Kim1* with immunofluorescence staining. (G) Expression levels of  
54 *Nrp2* in kidney after IR surgery in our study. (H) Co-expression of *Nrp1* and TGF- $\beta$   
55 receptors in DT cells.  
56



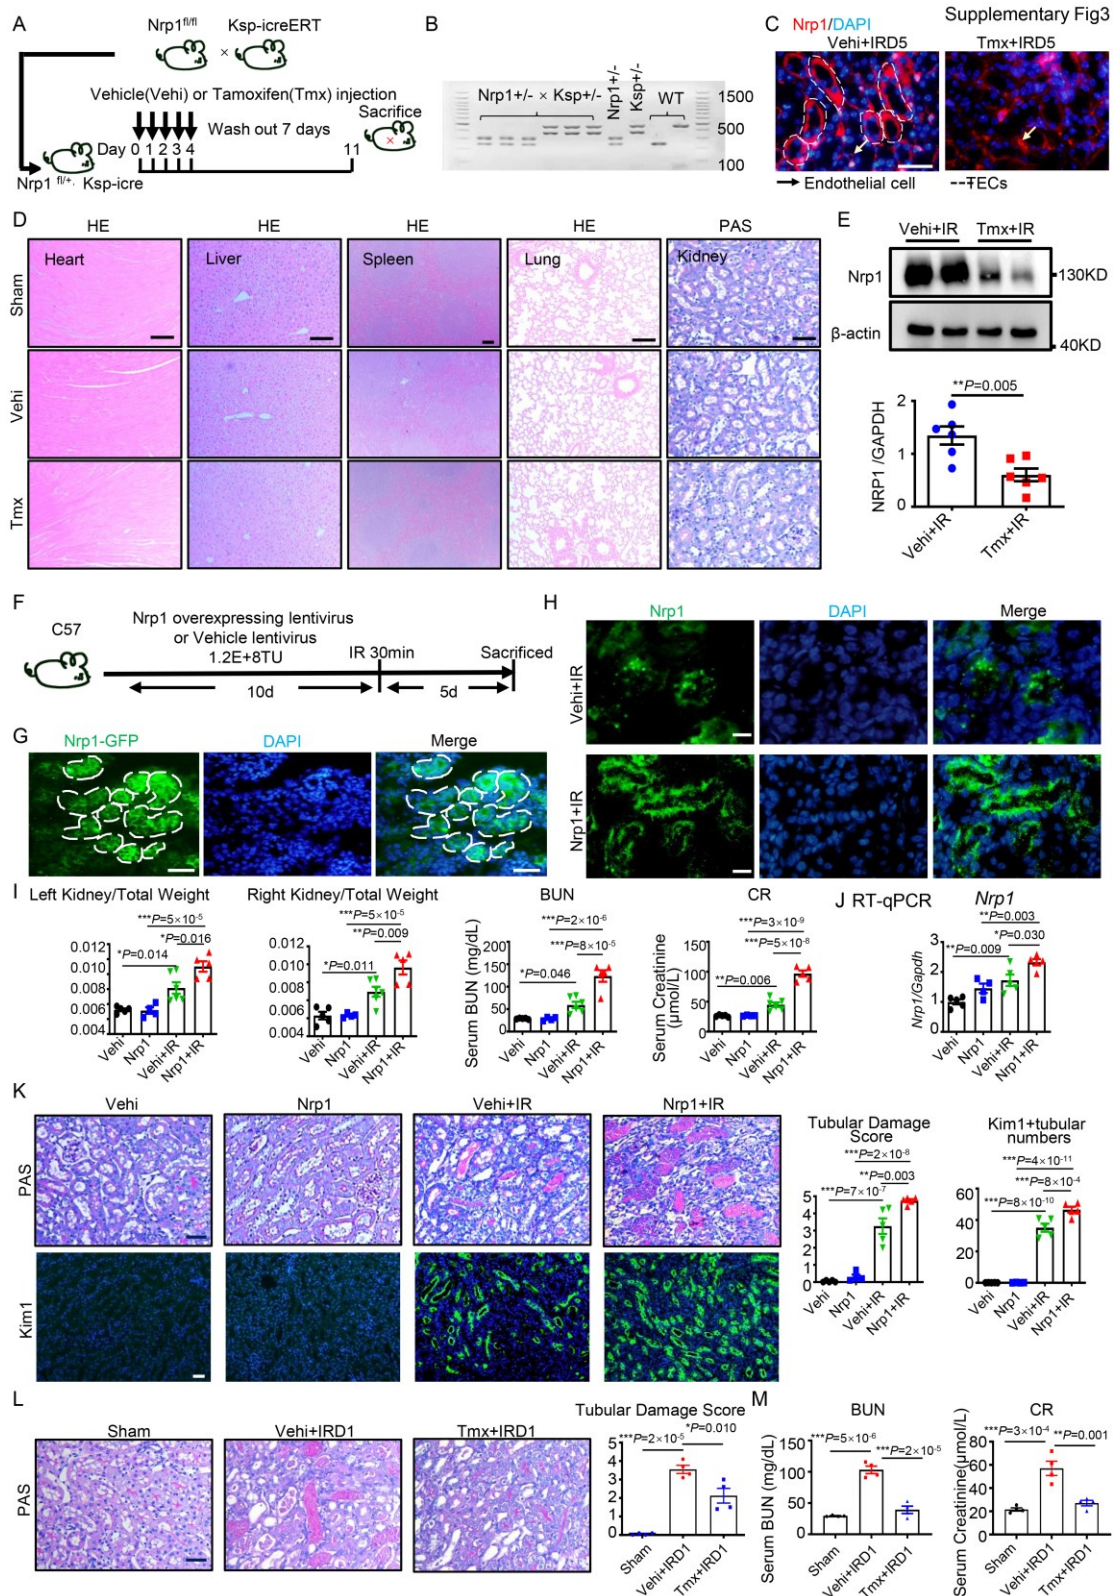

57

58 **Supplementary Figure 3. Knockout or overexpression of *Nrp1* in distal TECs.** (A) A

59 schematic diagram illustrating tubular *Nrp1* deletion. (B) Mouse tail DNA analysis to

60 validate gene knockouts. (C) *Nrp1* immunofluorescence staining after IR in mice. (D)

61 Histological analyses of tissues from the heart, liver, spleen, lungs, and kidneys of the gene  
62 knockout mice by H&E and PAS staining. Scale bar, 50  $\mu$ m. (E) Validation of Nrp1  
63 expression in gene knockout by Western Blotting ( $n = 6$  per group). (F) A schematic  
64 diagram illustrating the subcapsular injection of lentivirus for Nrp1 overexpression. (G)  
65 Fluorescence images of Nrp1 lentivirus with GFP. Scale bar, 20  $\mu$ m. (H) Fluorescence  
66 images of Nrp1 on day 5 after I-R in mice. Scale bar, 20  $\mu$ m. (I) Ratio of kidney weight  
67 versus body weight of mice (For Vehi,  $n=5$ ; Nrp1,  $n=4$ ; Vehi+IR,  $n=6$ ; Nrp1+IR,  $n=5$ ).  
68 Plasma BUN concentrations and creatinine (CR) concentrations in groups (For Vehi,  $n=5$ ;  
69 Nrp1,  $n=4$ ; Vehi+IR,  $n=6$ ; Nrp1+IR,  $n=5$ ). (J) Levels of mRNA encoding *Nrp1* by RT-qPCR  
70 (For Vehi,  $n=5$ ; Nrp1,  $n=4$ ; Vehi+IR,  $n=6$ ; Nrp1+IR,  $n=5$ ). (K) Representative micrographs  
71 and corresponding statistical scores of periodic acid-Schiff (PAS) staining and Kim1  
72 immunofluorescence staining on day 5 after IR in mice (For Vehi,  $n=5$ ; Nrp1,  $n=4$ ; Vehi+IR,  
73  $n=6$ ; Nrp1+IR,  $n=5$ ). (L) Representative micrographs and corresponding statistical scores  
74 of periodic acid-Schiff (PAS) staining on day 1 after IR in mice ( $n = 4$  per group). (M) Plasma  
75 BUN concentrations and creatinine (CR) concentrations in groups on day 1 after IR in mice  
76 ( $n = 4$  per group). Scale bar, 20  $\mu$ m.  $*P < 0.05$ ,  $**P < 0.01$ ,  $***P < 0.001$  as determined by  
77 one-way ANOVA. Data represent mean  $\pm$  SEM. Source data are provided as a Source  
78 Data file.  
79



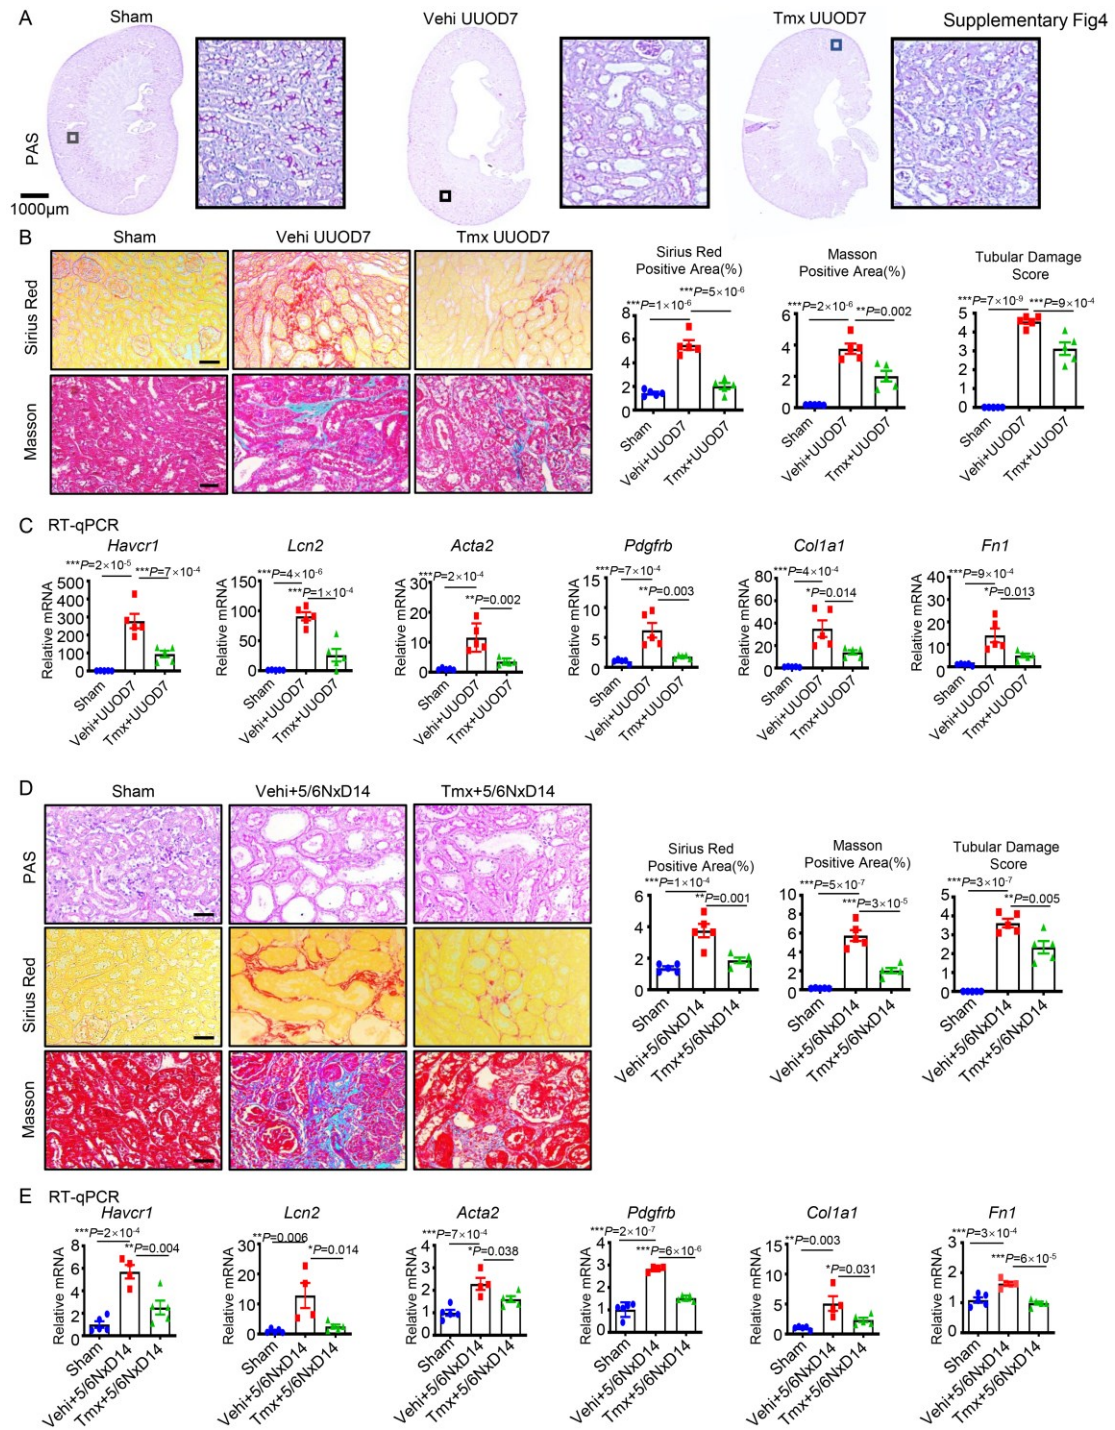

80

81 **Supplementary Figure 4. Knockout of *Nrp1* in distal TECs alleviates renal fibrosis**

82 **caused by UUO and 5/6 nephrectomy. (A) Whole-slide image of mouse kidney paraffin**

83 **sections stained with PAS after UUO surgery and statistical analysis of renal tubular injury**

84 **scores ( $n = 5$  per group). (B) Representative micrographs and corresponding statistical**

85 **scores of Sirius red and Masson on day 7 after UUO in mice ( $n = 5$  per group). (C)**

86 Expression levels of kidney damage related indicators (*Havcr1* and *Lcn2*) and fibrosis  
87 related indicators (*Acta2*, *Pdgfrb*, *Col1a1* and *Fn1*) at day 7 after UUO determined using  
88 RT-qPCR ( $n = 5$  per group). (D) Representative micrographs and corresponding statistical  
89 scores of PAS, Sirius red and Masson on day 14 after 5/6 nephrectomy in mice ( $n = 5$  per  
90 group). (E) Expression levels of kidney damage related indicators (*Havcr1* and *Lcn2*) and  
91 fibrosis related indicators (*Acta2*, *Pdgfrb*, *Col1a1* and *Fn1*) at day 14 after 5/6 nephrectomy  
92 determined using RT-qPCR (For Sham,  $n=5$ ; Vehi+5/6Nx14,  $n=4$ ; Tmx+5/6Nx14,  $n=5$ ).  
93 \* $P < 0.05$ , \*\* $P < 0.01$ , \*\*\* $P < 0.001$  as determined by one-way ANOVA. Scale bar, 20  $\mu\text{m}$ .  
94 Data represent mean  $\pm$  SEM. Source data are provided as a Source Data file.  
95

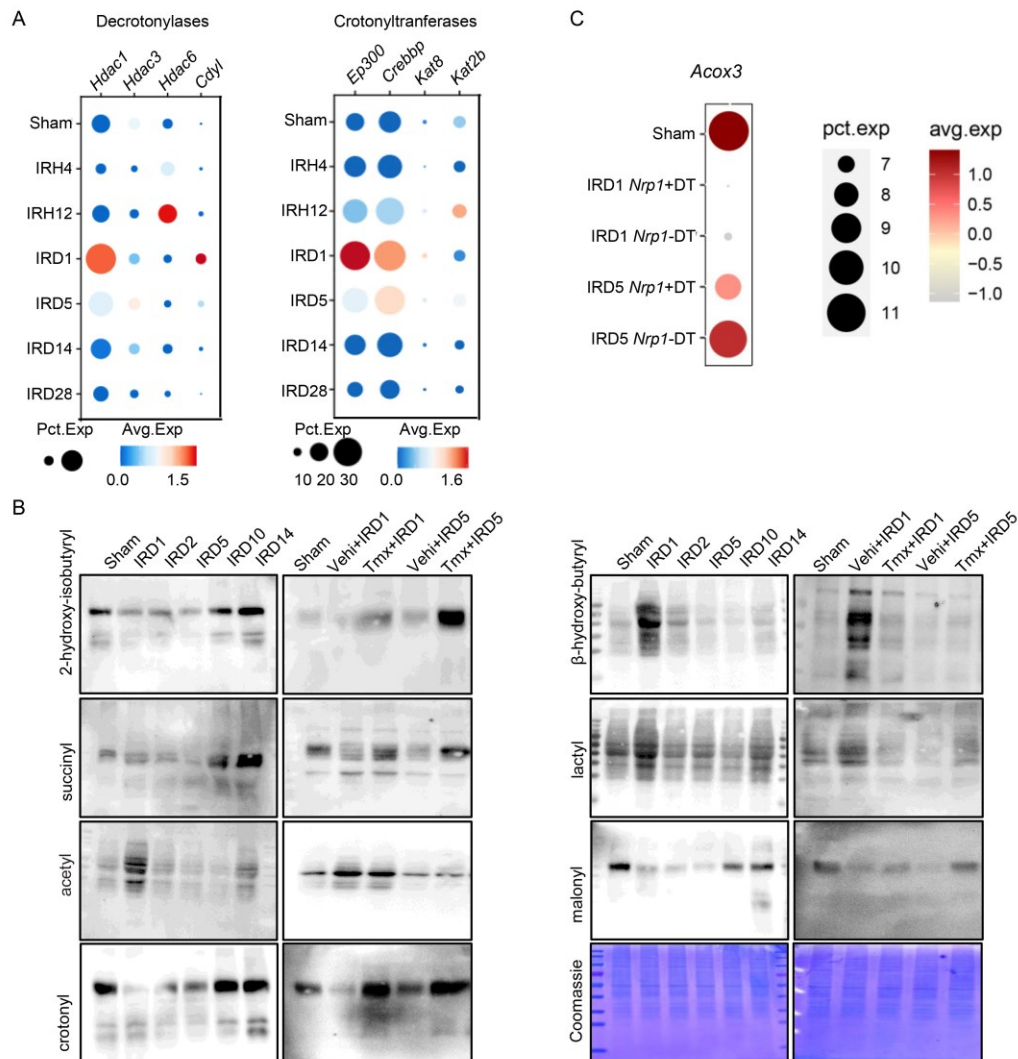

96

97 **Supplementary Figure 5. Changes in enzyme regulating lysine modifications and**98 **other classical post-translational modifications after I-R-induced injury. (A)**

99 Expression levels of decrotonylases and crotonyltransferases genes in kidney after I-R

100 surgery. (B) Western blotting analysis showing the changes in different lysine modifications

101 after I-R and *Nrp1* knockout. (C) Expression levels of *Acox3* in kidney after I-R surgery.

102 Source data are provided as a Source Data file.

103

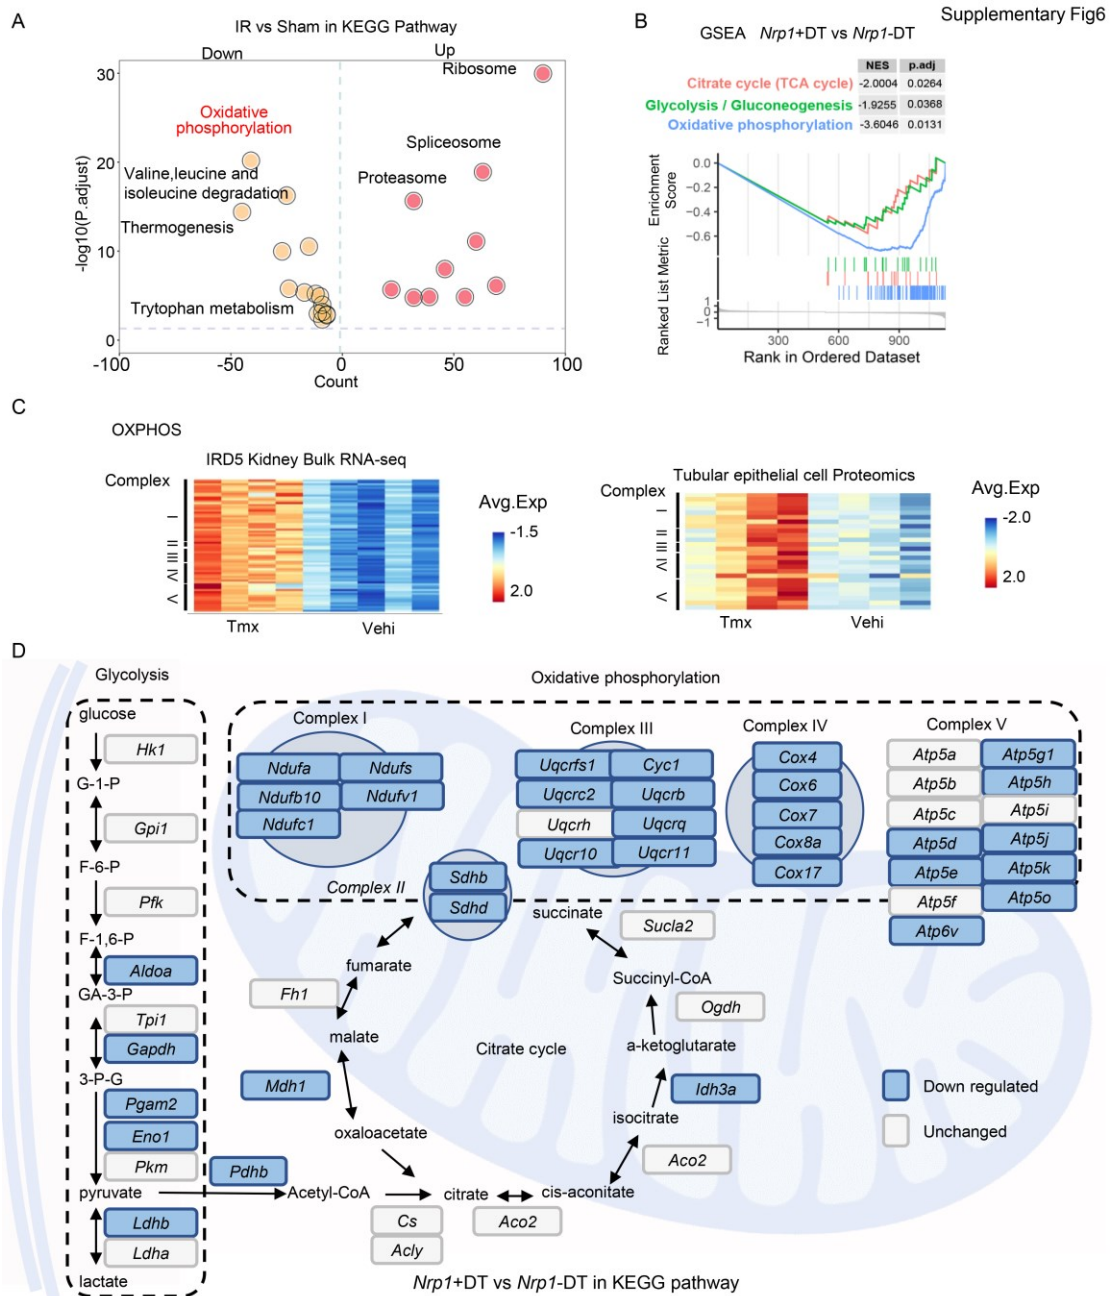

104

105 **Supplementary Figure 6. *Nrp1* inhibits OXPHOS levels in distal TECs.** (A) Regulated

106 KEGG pathways in I-R groups compared to sham groups in scRNA-seq data. The

107 horizontal axis represents the number of genes with significant differences enriched in

108 different pathways, positive values represent the number of genes upregulated by I-R

109 compared to the sham group, and negative values represent the number of genes

110 downregulated by I-R compared to the sham group. (B) Gene Set Enrichment Analysis

111 (GSEA) plot depicting the enrichment of gene sets related to OXPHOS, TCA, and  
112 glycolysis/gluconeogenesis pathways in *Nrp1*+ DT cells compared to *Nrp1*- DT cells. (C)  
113 The OXPHOS-related heatmap in IRD5 kidney bulk RNA-seq and pTECs proteomics (*n* =  
114 4 per group). (D) After IRD5, *Nrp1*+DT compared with *Nrp1*-DT, the pathway map of gene  
115 transcription level changes in OXPHOS, TCA and glycolysis pathway in scRNA-seq data.  
116 Scale: Blue corresponds to gene downregulation in *Nrp1*+DT compared to *Nrp1*- DT, while  
117 gray indicates no statistically significant change in gene expression. Source data are  
118 provided as a Source Data file.

119

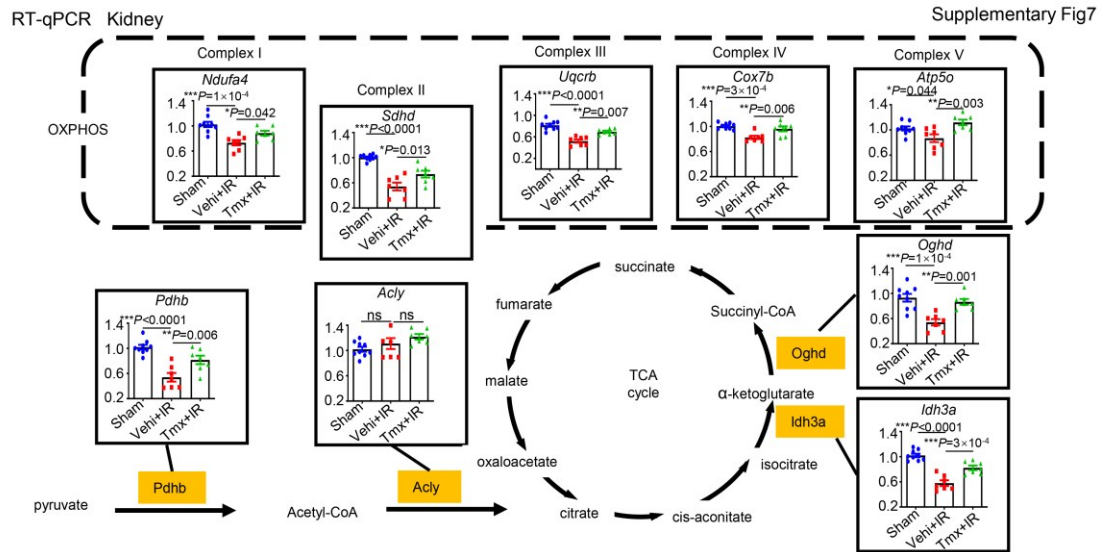

120

121 **Supplementary Figure 7. Nrp1 inhibited OXPHOS levels.** Renal tissue expression of

122 OXPHOS and TCA at day 5 after IR determined using RT-qPCR (For Sham,  $n=9$ ; Vehi+IR,

123  $n=7$ ; Tmx+IR,  $n=7$ ). \* $P < 0.05$ , \*\* $P < 0.01$ , \*\*\* $P < 0.001$  as determined by one-way ANOVA.

124 Data represent mean  $\pm$  SEM. Source data are provided as a Source Data file.

125



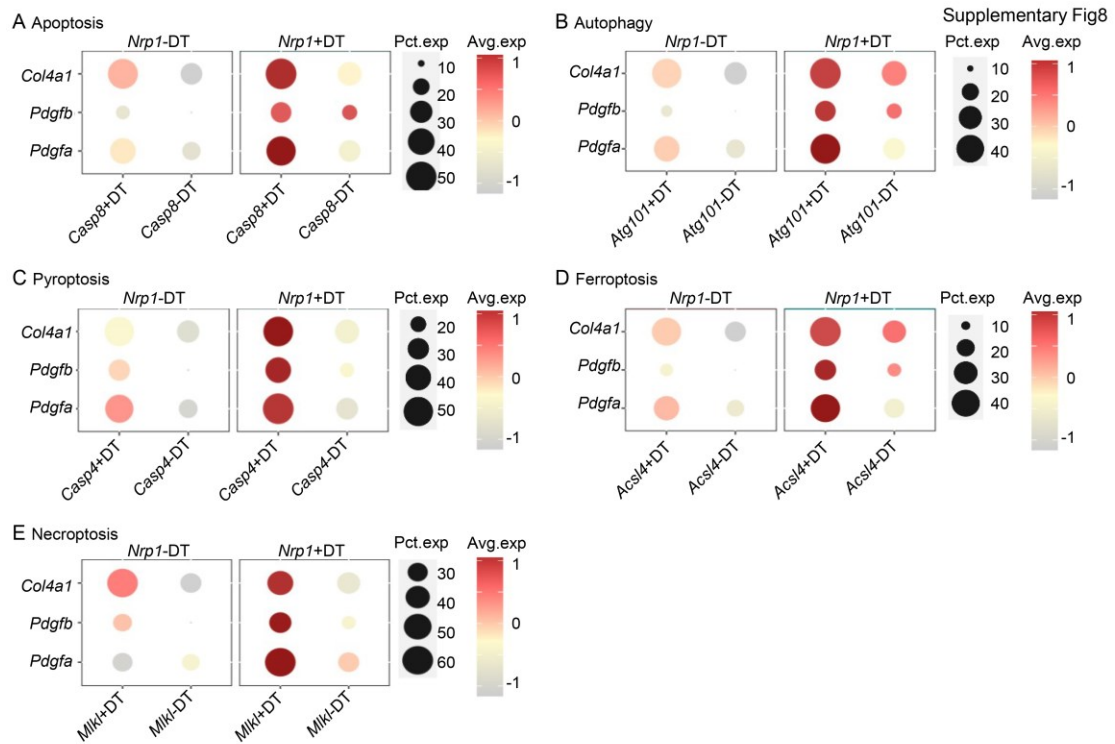

126

127

**Supplementary Figure 8. *Nrp1*+DT cells are rich in expression of cell death-related**

128

**genes and secrete large amounts of pro-fibrotic factors. (A) Dotplot of *Col4a1*, *Pdgfb*,**

129

**and *Pdgfa* expression in DT cells expressing the apoptosis representative gene *Casp8*. (B)**

130

**Dotplot of *Col4a1*, *Pdgfb*, and *Pdgfa* expression in DT cells expressing the autophagy**

131

**representative gene *Atg101*. (C) Dotplot of *Col4a1*, *Pdgfb*, and *Pdgfa* expression in DT**

132

**cells expressing the pyroptosis representative gene *Casp4*. (D) Dotplot of *Col4a1*, *Pdgfb*,**

133

**and *Pdgfa* expression in DT cells expressing the ferroptosis representative gene *Acs14*. (E)**

134

**Dotplot of *Col4a1*, *Pdgfb*, and *Pdgfa* expression in DT cells expressing the necroptosis**

135

**representative gene *Mkl1*.**

136

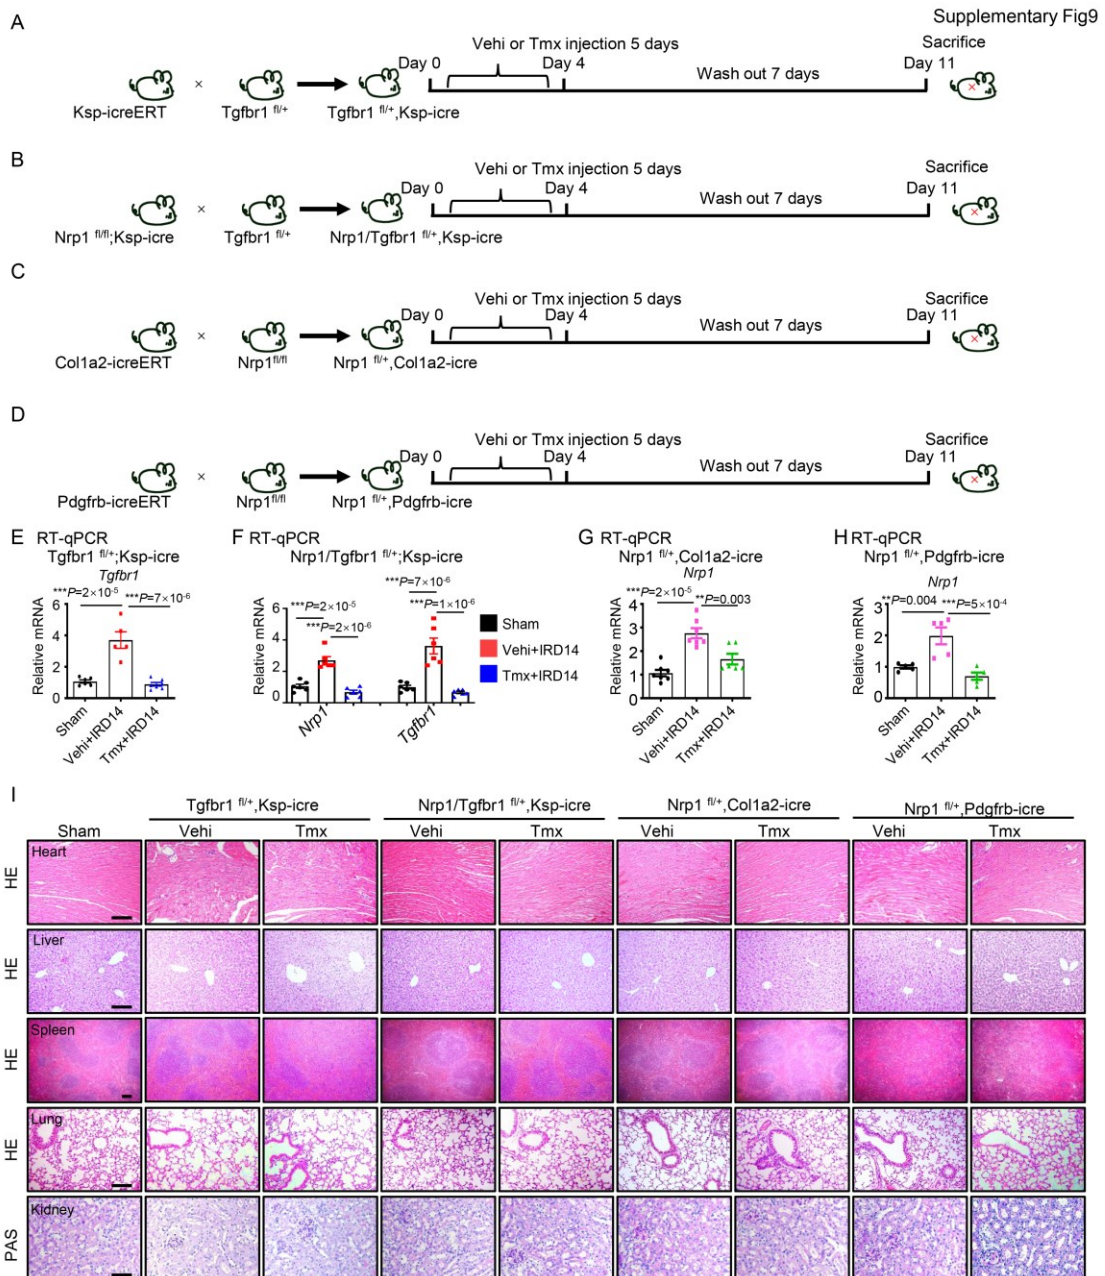

137

138 **Supplementary Figure 9. Construction of distal tubular-specific *Nrp1* and *Tgfr1***

139 **double-gene knockout mice, as well as myofibroblast-specific *Nrp1* knockout mice**

140 **and pericyte-specific *Nrp1* knockout mice. (A) A schematic diagram illustrating the**

141 **tubular-specific *Tgfr1* knockout. (B) A schematic diagram illustrating the tubular-specific**

142 ***Nrp1* and *Tgfr1* double-gene knockout. (C) A schematic diagram illustrating the**

143 **myofibroblast-specific *Nrp1* knockout. (D) A schematic diagram illustrating the pericyte-**

144 specific *Nrp1* knockout. (E) RT-qPCR experiments were conducted using mice from A to  
145 determine the expression levels of *Nrp1* and/or *Tgfbr1* (For Sham,  $n=6$ ; Vehi+IRD14,  $n=5$ ;  
146 Tmx+IRD14,  $n=7$ ). (F) RT-qPCR experiments were conducted using mice from B to  
147 determine the expression levels of *Nrp1* and/or *Tgfbr1* ( $n = 6$  per group). (G) RT-qPCR  
148 experiments were conducted using mice from C to determine the expression levels of *Nrp1*  
149 and/or *Tgfbr1* (For Sham,  $n=7$ ; Vehi+IRD14,  $n=7$ ; Tmx+IRD14,  $n=6$ ). (H) RT-qPCR  
150 experiments were conducted using mice from D to determine the expression levels of *Nrp1*  
151 and/or *Tgfbr1* ( $n = 5$  per group). (I) Histological analyses of section from the heart, liver,  
152 spleen, lungs, and kidneys of the gene knockdown mice by H&E and PAS staining.  $*P <$   
153  $0.05$ ,  $**P < 0.01$ ,  $***P < 0.001$  as determined by one-way ANOVA. Scale bar,  $50 \mu\text{m}$ . Data  
154 represent mean  $\pm$  SEM. Source data are provided as a Source Data file.  
155



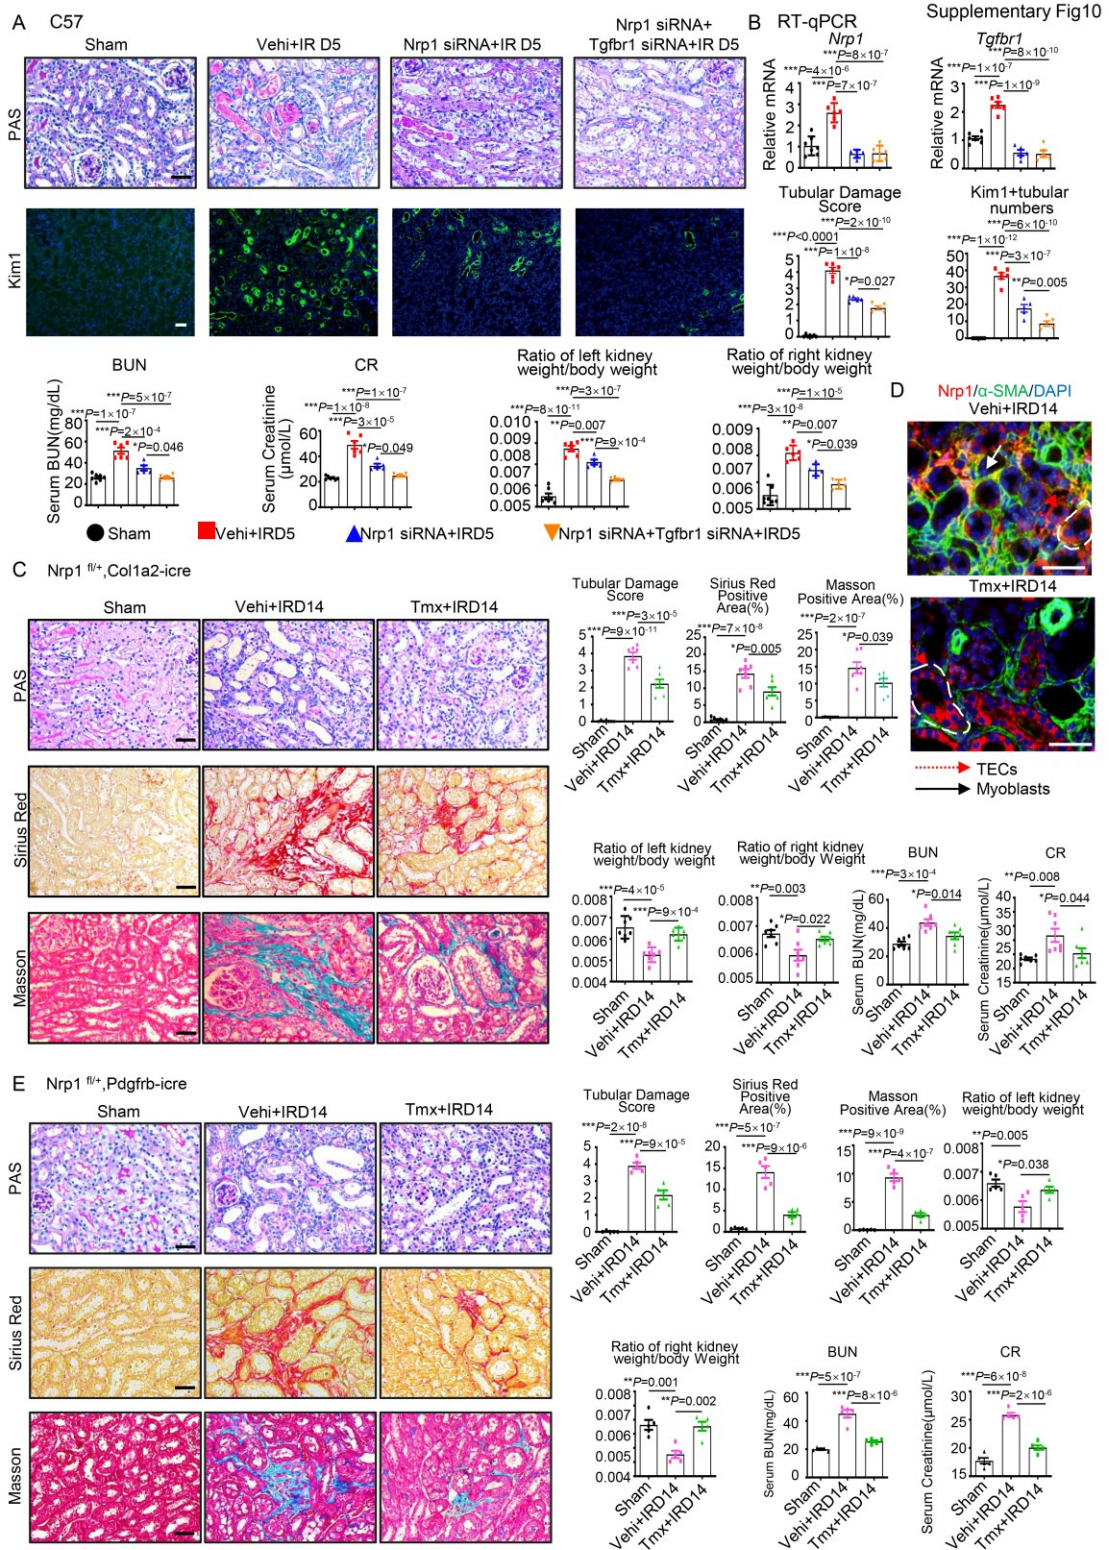

156

157 **Supplementary Figure 10. Injection of *Nrp1* and *Tgfr1* siRNA under the renal capsule,**

158 **or deletion of *Nrp1* in myfibroblasts or pericytes attenuates I-R-induced renal injury.**

159 (A) Representative micrographs and corresponding statistical scores of PAS and Kim1

160 immunofluorescence staining on day 5 after renal capsule injection of *Nrp1* and *Tgfr1*  
161 siRNA in C57 mice with I-R injury. Ratio of kidney weight versus body weight of mice.  
162 Plasma BUN concentrations and CR concentrations in sham, Vehi + IR, *Nrp1* siRNA + IR,  
163 or *Nrp1* siRNA + *Tgfr1* siRNA + IR groups at 5 days. For Sham,  $n=7$ ; Vehi+IRD5,  $n=6$ ; *Nrp1*  
164 siRNA+IRD5,  $n=5$ ; *Nrp1* siRNA+*Tgfr1* siRNA+IRD5,  $n=5$ . (B) Expression levels of *Nrp1*  
165 and *Tgfr1* in kidneys of C57 mice with IR injury, after renal capsule injection of *Nrp1* and  
166 *Tgfr1* siRNA, were detected by RT-qPCR (For Sham,  $n=7$ ; Vehi+IRD5,  $n=6$ ; *Nrp1*  
167 siRNA+IRD5,  $n=5$ ; *Nrp1* siRNA+*Tgfr1* siRNA+IRD5,  $n=5$ ). (C) Representative  
168 micrographs and corresponding statistical scores of PAS, Masson, and Sirius red staining  
169 on day 14 after I-R in mice with myofibroblast-specific *Nrp1* knockout ( $n = 7$  per group).  
170 Ratio of kidney weight versus body weight of mice ( $n = 7$  per group). Plasma BUN  
171 concentrations and CR concentrations in sham, Vehi + IR, or Tmx + IR groups at 14 days  
172 ( $n = 7$  per group). (D) Co-expression of *Nrp1* with  $\alpha$ -SMA with immunofluorescence staining.  
173 (E) Representative micrographs and corresponding statistical scores of PAS, Masson, and  
174 Sirius red staining on day 14 after I-R in mice with pericyte-specific *Nrp1* knockout ( $n = 5$   
175 per group). Ratio of kidney weight versus body weight of mice ( $n = 5$  per group). Plasma  
176 BUN concentrations and CR concentrations in sham, Vehi + IR, or Tmx + IR groups at 14  
177 days ( $n = 5$  per group). \* $P < 0.05$ , \*\* $P < 0.01$ , \*\*\* $P < 0.001$  as determined by one-way  
178 ANOVA. Scale bar, 20  $\mu\text{m}$ . Data represent mean  $\pm$  SEM. Source data are provided as a  
179 Source Data file.  
180

181

**Table S1. General characteristics of study participants (Related to Figure 1)**

| Variable                            | eGFR < 30 ml/min/1.73 m <sup>2</sup><br>(n = 115) | eGFR ≥ 30 ml/min/1.73 m <sup>2</sup><br>(n = 102) | <i>P</i>           |
|-------------------------------------|---------------------------------------------------|---------------------------------------------------|--------------------|
| Gender male                         | 86/115(74.8%)                                     | 74/102(72.5%)                                     | 0.709 <sup>c</sup> |
| Age (years)                         | 41.72±1.039                                       | 40.11±1.14                                        | 0.296 <sup>a</sup> |
| Hypertension positive               | 100/115(87.0%)                                    | 82/102(80.4%)                                     | 0.189 <sup>c</sup> |
| Diabetes positive                   | 11/115(9.6%)                                      | 11/102(10.8%)                                     | 0.767 <sup>c</sup> |
| White blood cell,10 <sup>9</sup> /L | 6.5±0.27                                          | 7.0±0.24                                          | 0.139 <sup>a</sup> |
| Neutrophil,10 <sup>9</sup> /L       | 4.66±0.25                                         | 4.56±0.22                                         | 0.765 <sup>a</sup> |
| Lymphocyte,10 <sup>9</sup> /L       | 1.37±0.16                                         | 1.78±0.07                                         | 0.031 <sup>a</sup> |
| Monocyte,10 <sup>9</sup> /L         | 0.55±0.04                                         | 0.57±0.22                                         | 0.561 <sup>a</sup> |
| Platelet,10 <sup>9</sup> /L         | 191.08±6.00                                       | 202.67±6.01                                       | 0.176 <sup>a</sup> |
| Na <sup>+</sup> ,mmol/L             | 139.78±0.29                                       | 140.38±0.19                                       | 0.099 <sup>a</sup> |
| K <sup>+</sup> ,mmol/L              | 7.27±2.76                                         | 4.32±0.06                                         | 0.321 <sup>a</sup> |
| Cl <sup>-</sup> ,mmol/L             | 105.2(101.5-109.1)                                | 105.6(103.5-107.3)                                | 0.453 <sup>b</sup> |
| Ca <sup>2+</sup> ,mmol/L            | 2.19±0.02                                         | 2.33±0.03                                         | 0.000 <sup>a</sup> |
| ALT,U/L                             | 10(7-16)                                          | 11(7-16)                                          | 0.412 <sup>b</sup> |
| AST,U/L                             | 14(11-18)                                         | 15(12-18)                                         | 0.134 <sup>b</sup> |
| Total protein,g/L                   | 61.80±0.89                                        | 65.80±0.66                                        | 0.000 <sup>a</sup> |
| Albumin,g/L                         | 36.04±0.65                                        | 39.08±0.53                                        | 0.000 <sup>a</sup> |
| Globulin,g/L                        | 25.97±0.48                                        | 26.30±0.47                                        | 0.632 <sup>a</sup> |
| Cholesterol,mmol/L                  | 4.57±0.14                                         | 4.69±0.14                                         | 0.539 <sup>a</sup> |
| Uric acid,μmol/L                    | 390.19±11.37                                      | 381.81±10.13                                      | 0.583 <sup>a</sup> |
| Urinary red cell,μL                 | 10.4(4.3-29.4)                                    | 8.1(3.9-31.1)                                     | 0.616 <sup>b</sup> |
| Urinary white cell,μL               | 6.6(2.7-11.5)                                     | 3.9(2.2-9.9)                                      | 0.146 <sup>b</sup> |
| Urinary cast,μL                     | 0.1(0-0.4)                                        | 0.1(0-0.4)                                        | 0.811 <sup>b</sup> |
| NRP1 high,n%                        | 73/115(63.5%)                                     | 46/102(45.1%)                                     | 0.007 <sup>c</sup> |

182 The bold values indicate *P* < 0.05.

183 Data are presented as mean ± SEM or median (25–75th percentiles) or a percentage.

184 Tubular NRP1 high cell was defined as the number of NRP1 positive cells ≥50th  
185 percentiles.186 <sup>a</sup>t-test, <sup>b</sup>Mann–Whitney U test, <sup>c</sup>Pearson's chi-squared test.

187 All statistical analyses were two-sided.

188



189 **Table S2. Sequence for Nrp1 Used for Fluorescence in**  
190 **Situ Hybridization (Related to methods section)**

| Gene        | Sequence(5'to3')         |
|-------------|--------------------------|
|             | GTAACCGGGAGATGTGAGGTACCC |
|             | AGGATTCGAGTCTTGCTCCAGGTC |
| <i>Nrp1</i> | TGGATAGAACGCCTGAAGAGGAGC |
|             | TGTGGCTCTCTCAGGGTAGATCCT |
|             | CCAGAAGGTCATACAGTGGGCAGA |

191

192

193 **Table S3. List and sequence for primers used for RT-qPCR(Related to methods**  
 194 **section)**

| Gene          | Forward(5'to3')          | Reverse(5'to3')         |
|---------------|--------------------------|-------------------------|
| <i>Gapdh</i>  | TGACCTCAACTACATGGTCTACA  | CTTCCCATTCTCGGCCTTG     |
| <i>Nrp1</i>   | CAAGGAGTGGCACAGCATCT     | GGAGCACCACATCCACAGAA    |
| <i>Tgfbr1</i> | TCTGCATTGCACTTATGCTGA    | AAAGGGCGATCTAGTGATGGA   |
| <i>Havcr1</i> | ACATATCGTGGAATCACAACGAC  | ACTGCTCTTCTGATAGGTGACA  |
| <i>Lcn2</i>   | GCAGGTGGTACGTTGTGGG      | CTCTTGTAGCTCATAGATGGTGC |
| <i>Acta2</i>  | CCCAGACATCAGGGAGTAATGG   | TCTATCGGATACTTCAGCGTCA  |
| <i>Pdgfrb</i> | AGGAGTGATACCAGCTTTAGTCC  | CCGAGCAGGTCAGAACAAAGG   |
| <i>Col1a1</i> | GCTCCTCTTAGGGGCCACT      | CCACGTCTCACCATTGGGG     |
| <i>Col1a2</i> | TCGTGCCTAGCAACATGCC      | TTTGTGAGAATACTGAGCAGCAA |
| <i>Fn1</i>    | GCTCAGCAAATCGTGCAGC      | CTAGGTAGGTCCGTTCCCACT   |
| <i>Nfkb1</i>  | ATGGCAGACGATGATCCCTAC    | CGGAATCGAAATCCCCTCTGTT  |
| <i>Smad3</i>  | CATTCCATTCCCAGAGAACAATAA | GCTGTGGTTCATCTGGTGGT    |
| <i>Ndufa4</i> | TCCCAGCTTGATTCTCTCTT     | GGGTTGTTCTTTCTGTCCCAG   |
| <i>Sdhd</i>   | TGGTCAGACCCGCTTATGTG     | GGTCCAGTGGAGAGATGCAG    |
| <i>Uqcrb</i>  | GGCCGATCTGCTGTTTCAG      | CATCTCGCATTAAACCCAGTT   |
| <i>Cox7b</i>  | TTGCCCTTAGCCAAAACGC      | TCATGGAAACTAGGTGCCCTC   |
| <i>Atp5o</i>  | TCTCGACAGGTTCCGAGCTT     | TTGACGGTGCGCTTGATGTAG   |
| <i>Pdhb</i>   | AAGAGGCGTTTTACCGCTC      | GTCACCGTATTTCTTCCACAGG  |
| <i>Acly</i>   | ACCCTTTCACTGGGGATCACA    | GACAGGGATCAGGATTTCTTG   |
| <i>Oghd</i>   | GTTTCTTCAAACGTGGGGTTCT   | GCATGATTCCAGGGGTCTCAA   |
| <i>Idh3a</i>  | TGGGTGTCCAAGGTCTCTC      | CTCCCCTGAATAGGTGCTTTG   |

195  
 196

197 **References**

- 198 1. <https://singlecell.broadinstitute.org/>.  
199 2. <https://www.spatialomics.org/SpatialDB>  
200 3. <https://www.biorender.com>
